# Supplementary material
Source: publisher figshare collection journal article supplement (https://gsapubs.figshare.com/articles/dataset/_/21732857)

Yinbiao Peng, Shengyao Yu, Sanzhong Li, Yongjiang Liu, Pei Lv, Chuanzhi Li, Liming Dai, Yunshuai Li, Xiangyu Gao, Xingzhou Jiang, and Wentao Ji, 2022, Diachronous subduction, closure of the Proto-Tethys Ocean, and collisional accretion of microcontinents: Insights from the early Paleozoic intermediate-mafic rocks in the Amdo microcontinent of the Tibetan Plateau: GSA Bulletin, <https://doi.org/10.1130/B36689.1>.

## Supplemental Material

**Table S1.** Summary of age data for the Ediacaran–early Paleozoic magmatic rocks in the East Asian blocks along the northern margin of East Gondwana.

**Table S2.** LA-ICP-MS zircon U-Pb dating results for the igneous rocks from the Amdo microcontinent, central Tibet.

**Table S3.** Hf isotopic data of zircons for the intermediate-mafic rocks from the Amdo microcontinent, central Tibet.

**Table S4.** Whole-rock Sr-Nd isotopic compositions of the meta-basites from the Amdo microcontinent, central Tibet.

**Table S5.** Major- and trace-element compositions of the intermediate-mafic rocks from the Amdo microcontinent, central Tibet.

**Figure S1.**  $\text{TiO}_2$  (wt%) vs.  $\text{Th/Nb}_{\text{PM}}$ , showing partial melting of spinel peridotite source with assimilation of crustal melts.

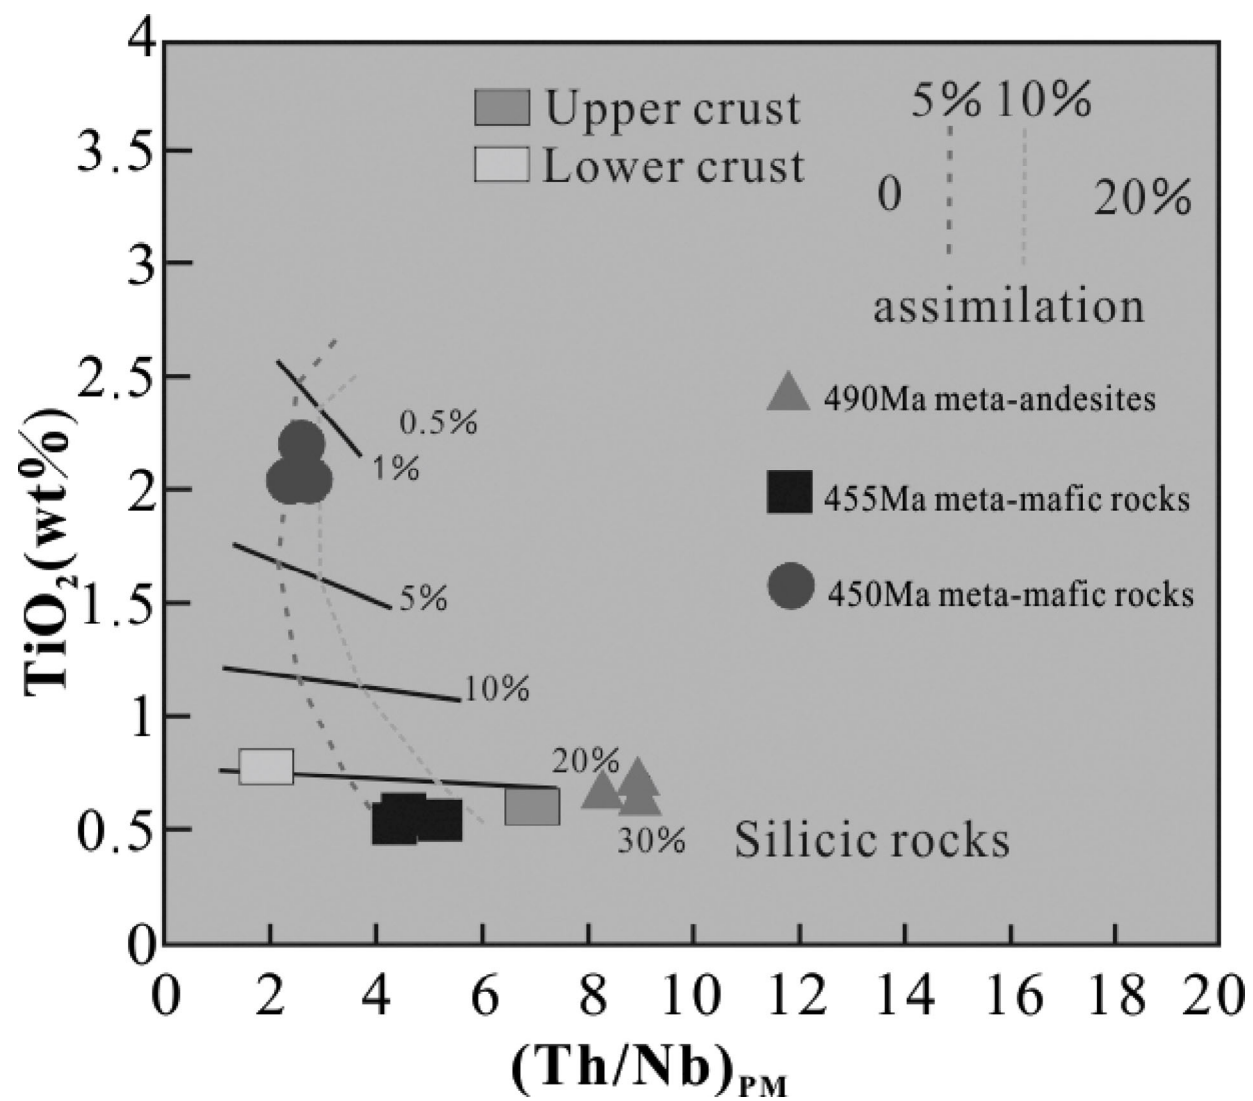

Supplement: Supplementary file 1 [file 1]
